# Supplementary material for: Synthesis and characterization of low viscosity hexafluoroacetylacetonate-based hydrophobic magnetic ionic liquids
Source: Royal Society of Chemistry journal article supplement (doi:10.1039/c7nj00206h), 2017-01-01
Supplement: c7nj00206h1.pdf [file c7nj00206h1.pdf]

## Electronic Supplementary Information

### **Synthesis and Characterization of Low Viscosity Hexafluoroacetylacetonate-based Hydrophobic Magnetic Ionic Liquids**

Stephen A. Pierson<sup>a</sup>, Omprakash Nacham<sup>a</sup>, Kevin D. Clark<sup>a</sup>, He Nan<sup>a</sup>,  
Yaroslav Mudryk<sup>b</sup>, and Jared L. Anderson<sup>a\*</sup>

<sup>a</sup>*Department of Chemistry, Iowa State University, 1605 Gilman Hall, Ames, IA  
50011, USA.*

<sup>b</sup>*Division of Materials Science and Engineering, Ames Laboratory, Iowa State  
University, 254 Spedding, Ames, IA 50011, USA*

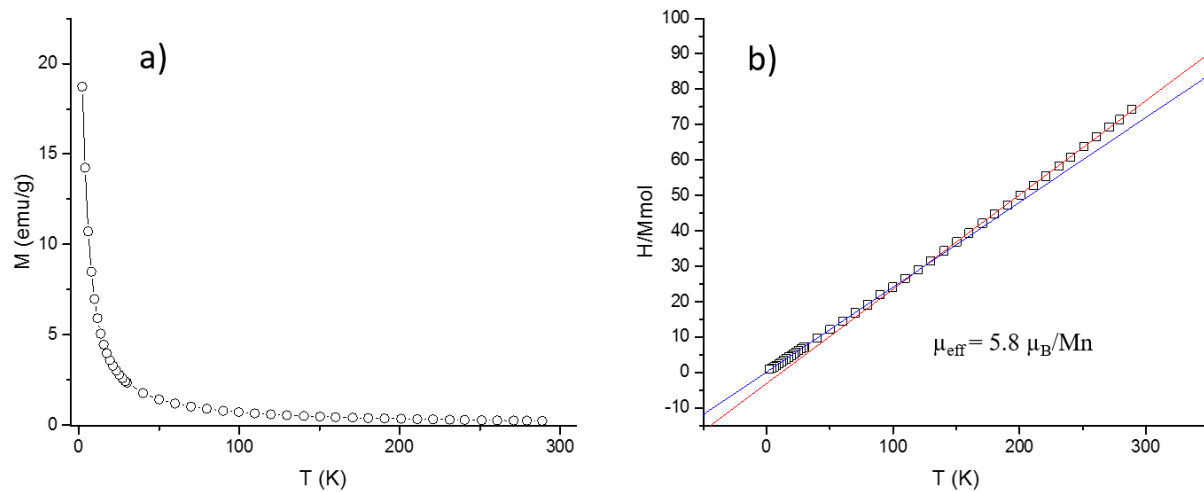

Figure S1. (a) Magnetization of the  $[P_{66614}^+][Mn(II)(hfacac)_3^-]$  MIL measured as a function of temperature in a 20000 Oe applied magnetic field (b) Curie-Weiss fits of both high- and low-temperature linear regions of the reciprocal susceptibility

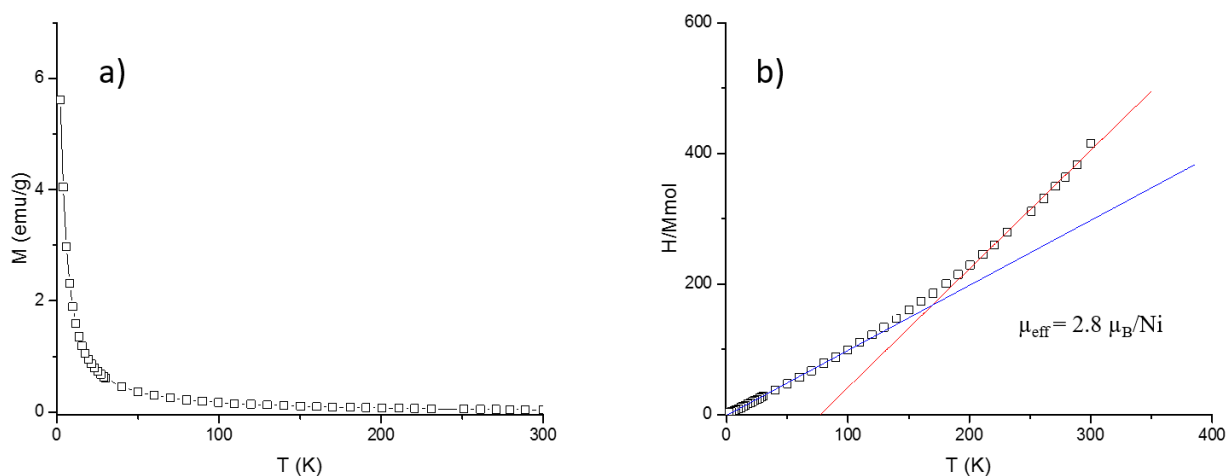

Figure S2. (a) Magnetization of the  $[\text{P}_{66614}^+][\text{Ni(II)(hfacac)}_3^-]$  MIL measured as a function of temperature in a 20000 Oe applied magnetic field (b) Curie-Weiss fits of the linear regions of the reciprocal susceptibility above and below the  $\sim 150$  K anomaly.

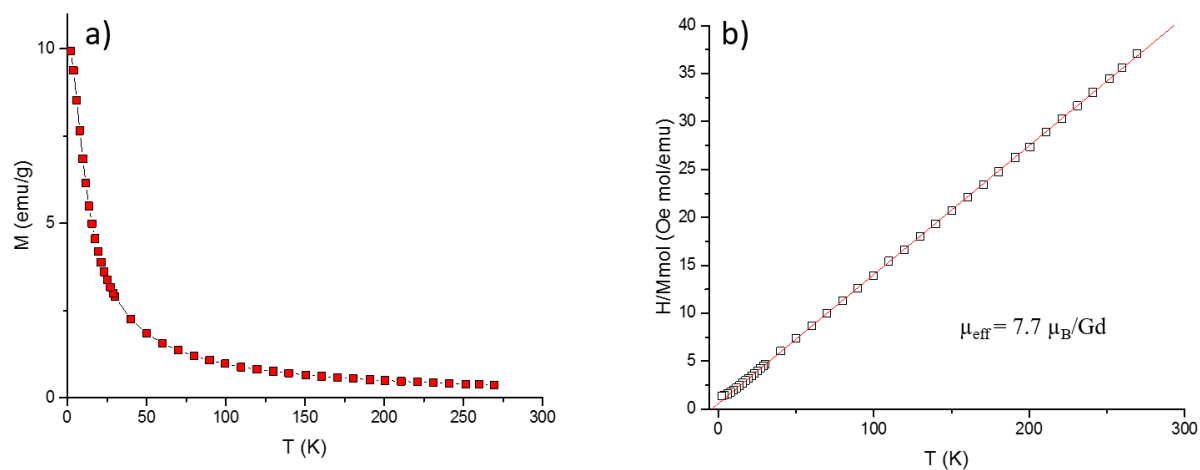

Figure S3. (a) Magnetization of the  $[\text{P}_{66614}^+][\text{Gd(III)(hfacac)}_4^-]$  MIL measured as a function of temperature in a 20000 Oe applied magnetic field (b) Curie-Weiss fit of the linear portion of the reciprocal susceptibility.

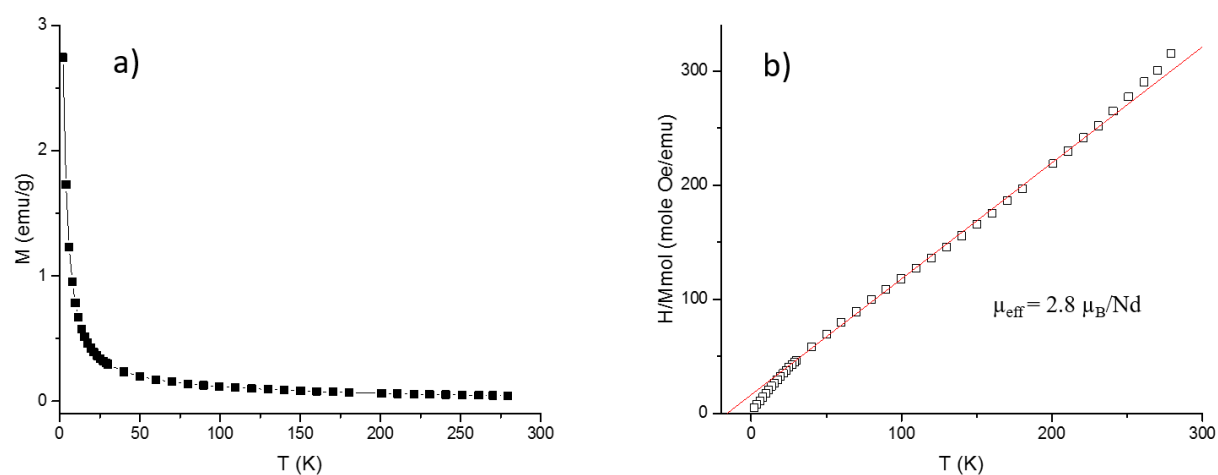

Figure S4. (a) Magnetization of the  $[P_{66614}^+][Nd(III)(hfacac)_4^-]$  MIL measured as a function of temperature in a 20000 Oe applied magnetic field (b) Curie-Weiss fit of the linear portion of the reciprocal susceptibility.

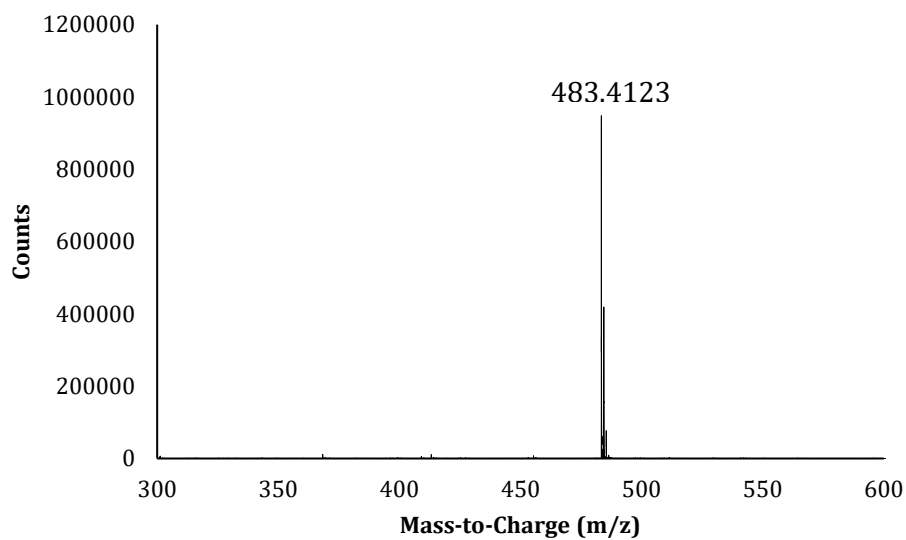

Figure S5. Mass spectrum of  $[P_{66614}^+]$  using TOF LC/MS (positive mode).

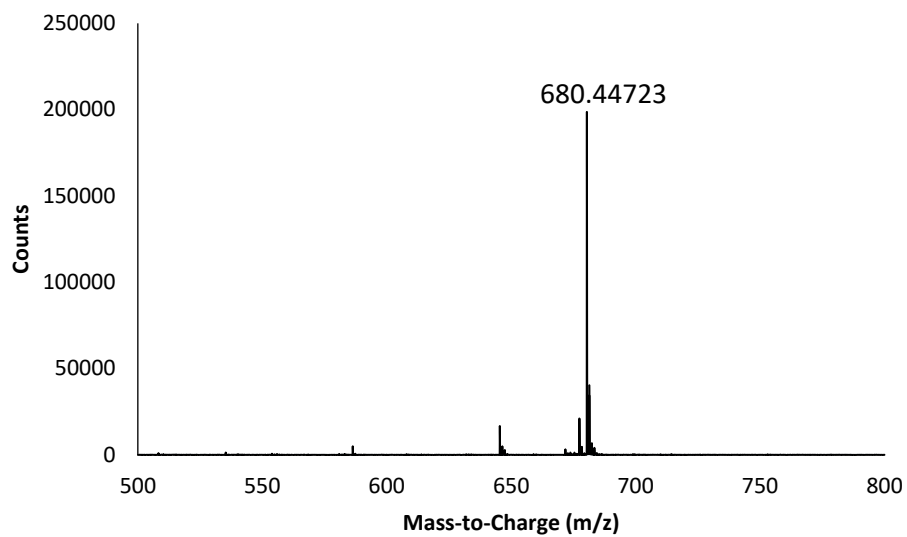

Figure S6. Mass spectrum of [Co(II)(hfacac)<sub>3</sub>]<sup>-</sup> using TOF LC/MS (negative mode).

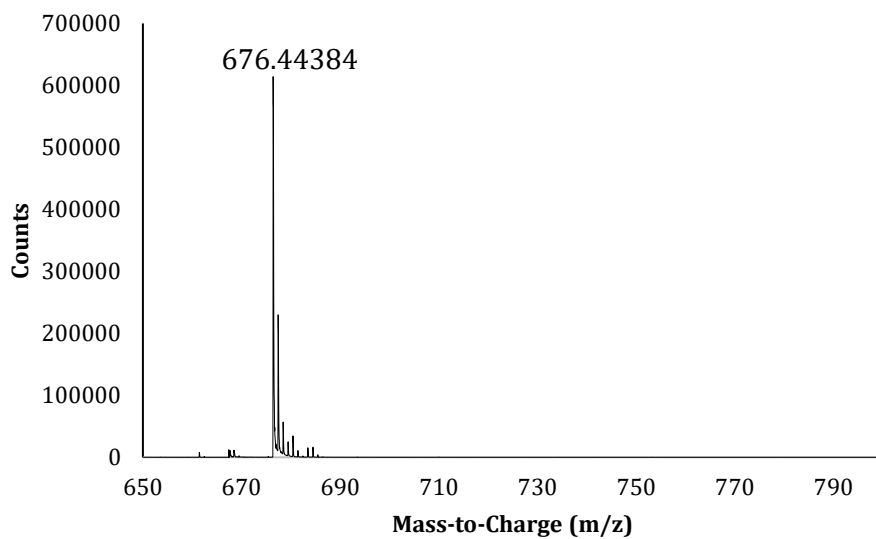

Figure S7. Mass spectrum of [Mn(II)(hfacac)<sub>3</sub>]<sup>-</sup> using TOF LC/MS (negative mode).

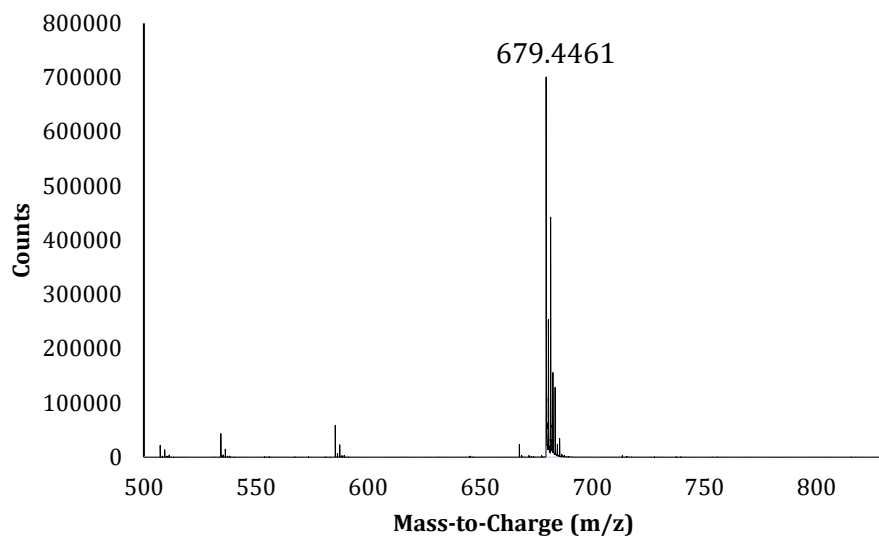

Figure S8. Mass spectrum of  $[\text{Ni(II)(hfacac)}_3]^-$  using TOF LC/MS (negative mode).

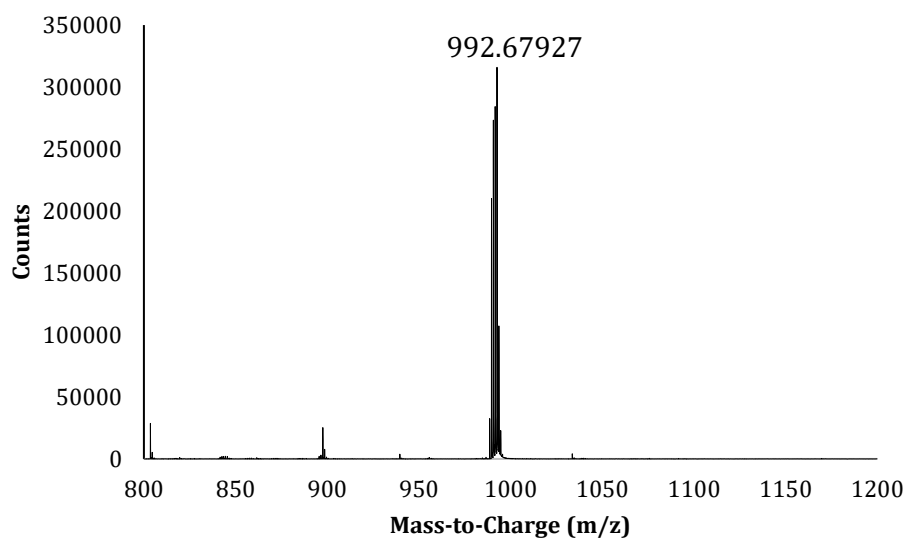

Figure S9. Mass spectrum of  $[\text{Dy(III)(hfacac)}_4]^-$  using TOF LC/MS (negative mode).

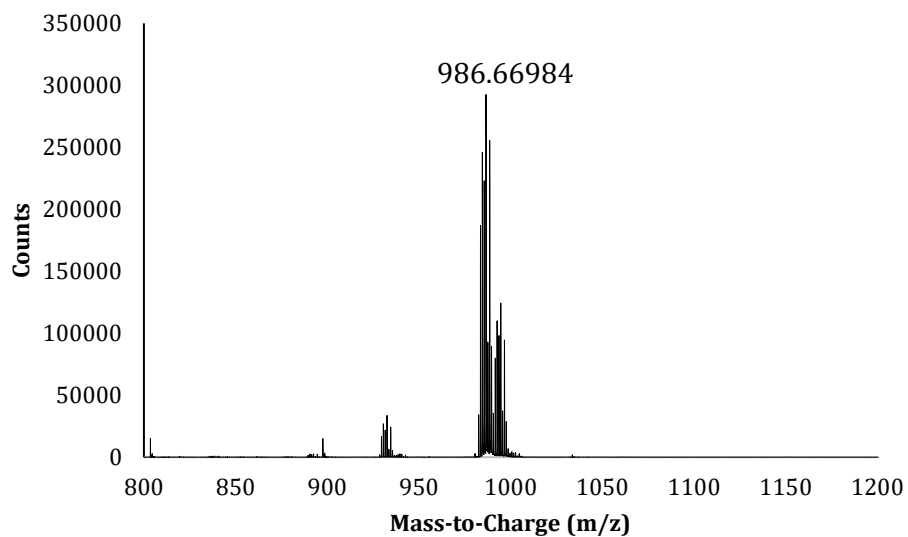

Figure S10. Mass spectrum of  $[\text{Gd(III)(hfacac)}_4^-]$  using TOF LC/MS (negative mode).

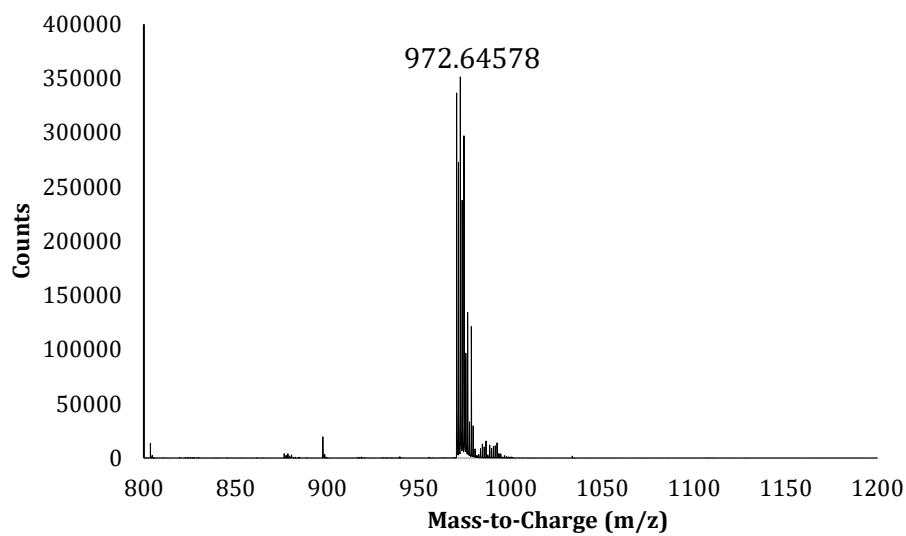

Figure S11. Mass spectrum of  $[\text{Nd(III)(hfacac)}_4^-]$  using TOF LC/MS (negative mode).

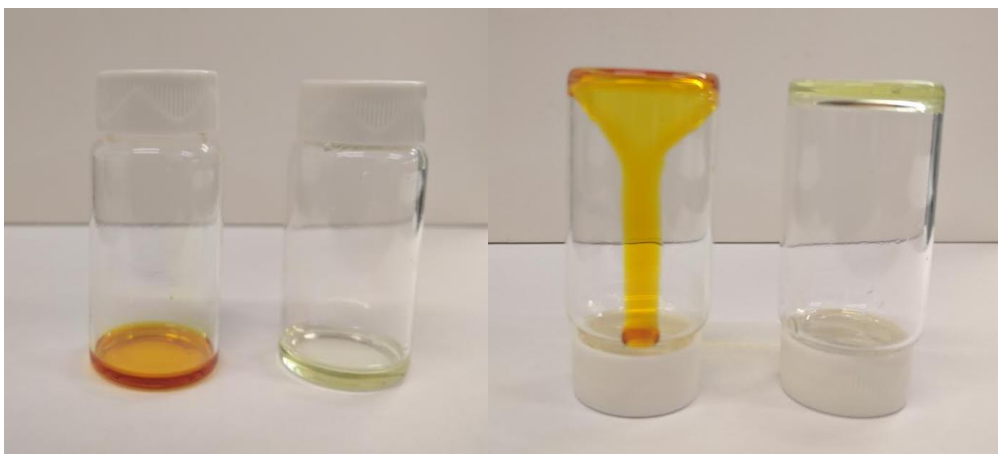

Figure S12.  $[P_{66614}^+][Mn(II)(hfacac)_3^-]$  (left) and  $[P_{66614}^+]_2[MnCl_4^{2-}]$  (right) before and after inversion for 2 seconds.

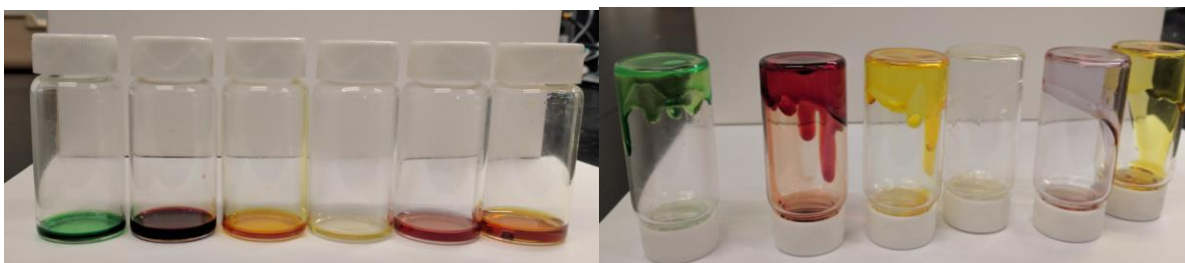

Figure S13. From left to right:  $[P_{66614}^+][Ni(II)(hfacac)_3^-]$ ,  $[P_{66614}^+][Co(II)(hfacac)_3^-]$ ,  $[P_{66614}^+][Mn(II)(hfacac)_3^-]$ ,  $[P_{66614}^+][Dy(III)(hfacac)_4^-]$ ,  $[P_{66614}^+][Nd(III)(hfacac)_4^-]$ , and  $[P_{66614}^+][Gd(III)(hfacac)_4^-]$  before and after inversion for 1 second.
